# Supplementary material for: Photoelectrochemical oxidation of anions by WO3 in aqueous and nonaqueous electrolytes
Source: Royal Society of Chemistry journal article supplement (doi:10.1039/c3ee40712h), 2013-01-01
Supplement: c3ee40712h.pdf [file c3ee40712h.pdf]

Electronic Supplementary Information for

**Photoelectrochemical Oxidation of Anions by  $\text{WO}_3$   
in Aqueous and Nonaqueous Electrolytes**

*by Qixi Mi, Robert H. Coridan, Bruce S. Brunschwig, Harry B. Gray,\* and Nathan S. Lewis\**

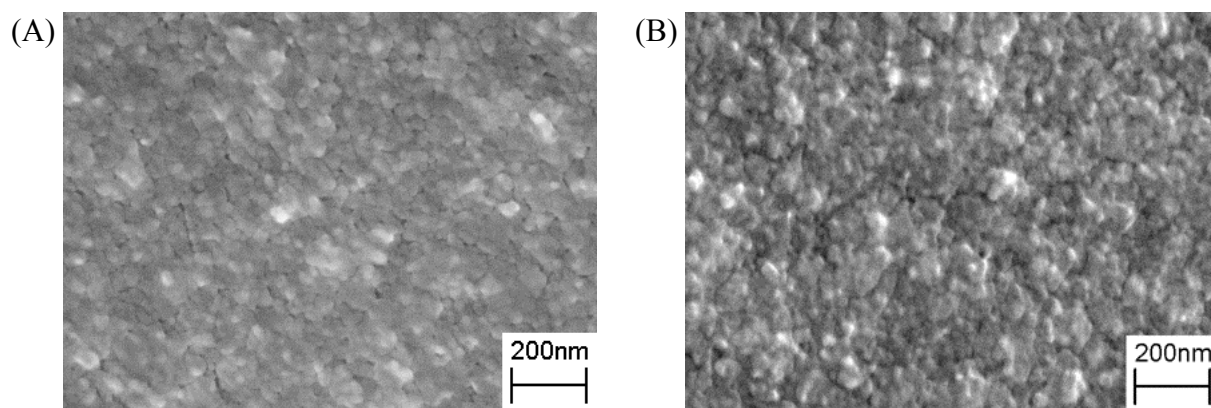

**Fig. S1** Scanning electron micrographs of (A)  $\text{WO}_3/\text{FTO}$  and (B)  $\text{WO}_3/\text{W}$  photoanodes.

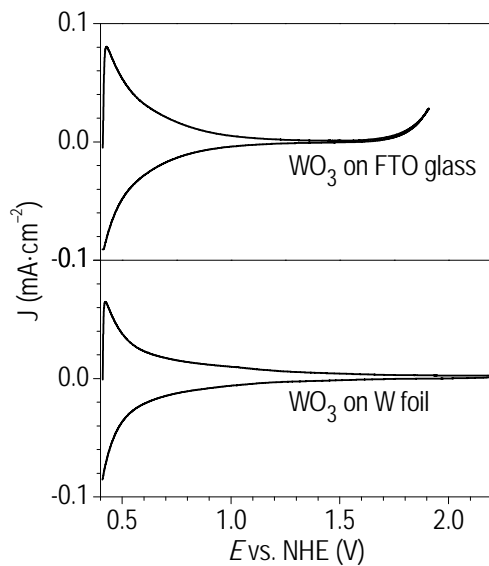

**Fig. S2** Cyclic voltammograms for a WO<sub>3</sub>/FTO electrode (top) and a WO<sub>3</sub>/W electrode (bottom) in contact with 1.0 M HCl(aq) in the dark.

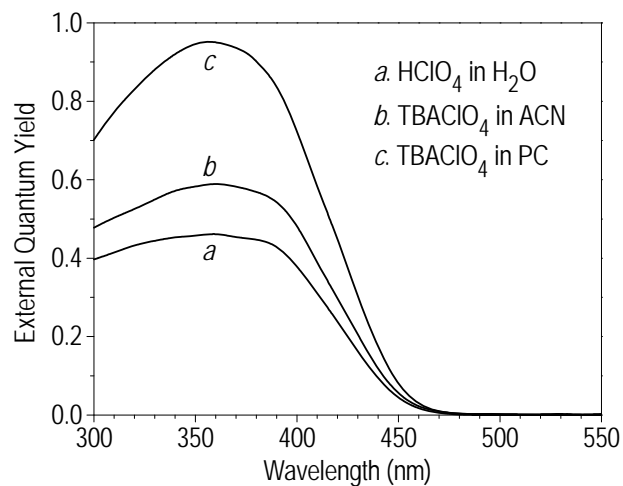

**Fig. S3** External quantum yields ( $\Phi_{\text{ext}}$ ) of the  $\text{WO}_3/\text{FTO}$  photoanode in contact with electrolytes that contained  $\text{ClO}_4^-$ . During these measurements, the electrode potential was fixed in the plateau region in Fig. 1, i.e., 1.7 V vs. NHE for 1.0 M  $\text{HClO}_4$  in water and 2.4 V for 0.50 M  $\text{TBAClO}_4$  in ACN or PC.

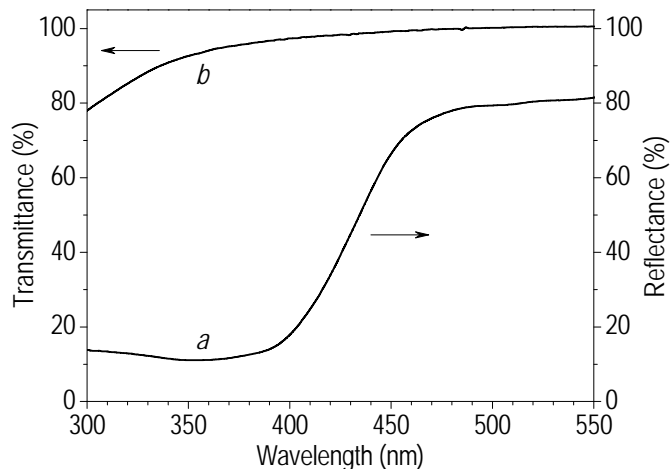

**Fig. S4** Correction factors for calculating internal quantum efficiency ( $\Phi_{\text{int}}$ ) from external quantum efficiency ( $\Phi_{\text{ext}}$ ). (a) Diffuse reflectance spectrum of the  $\text{WO}_3/\text{FTO}$  photoanode. (b) Transmittance of propylene carbonate through a path length of 1.2 cm, which was calculated from the absorption spectrum of propylene carbonate measured against water. No light absorption was detectable in the shown wavelength range for the electrolytes in water or acetonitrile.

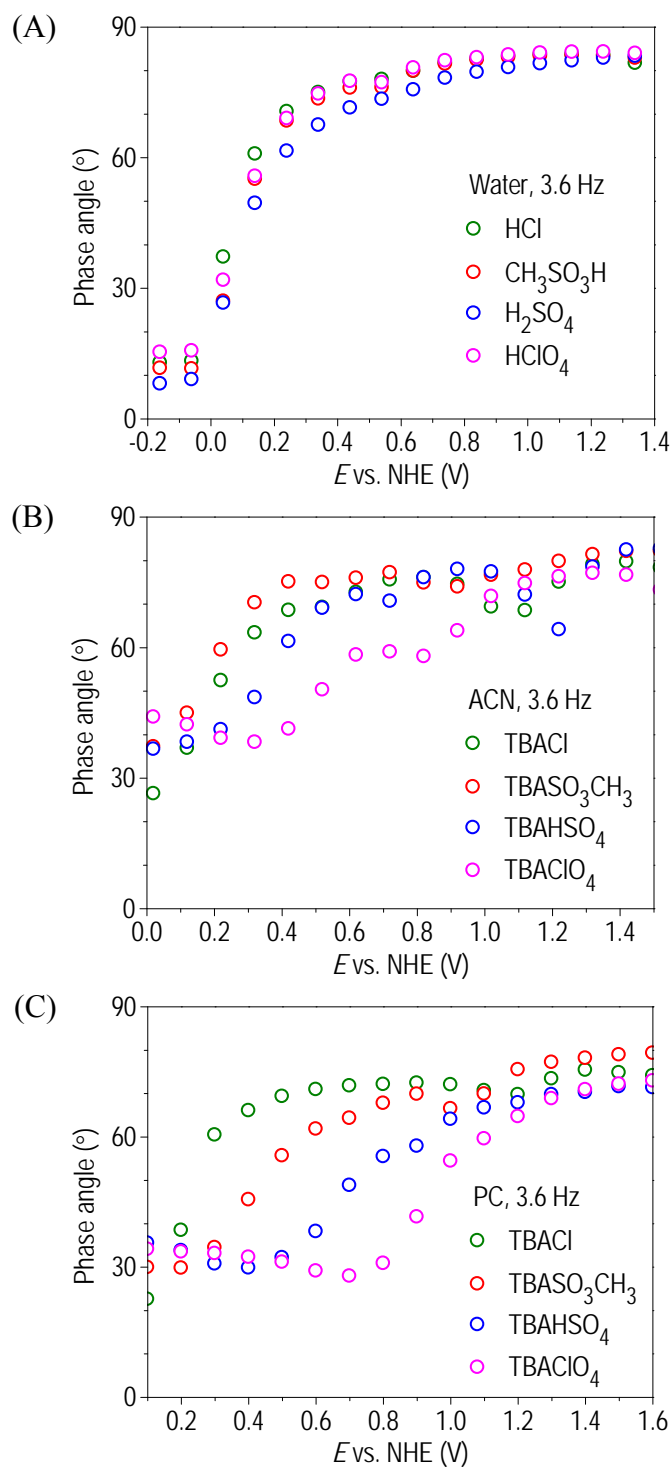

**Fig. S5** Bode plots of electrochemical impedance data for a  $\text{WO}_3/\text{FTO}$  photoanode in contact with various electrolytes in (A) water, (B) acetonitrile, and (C) propylene carbonate. These data were also presented as the Mott–Schottky plots in Fig. 3.

**Table S1** Flat-band potentials ( $E_{fb}$ , in V vs NHE) derived from linear fits in Fig. 3.

|       | Modulation frequency = 3.6 Hz |                                              |                               |                               | Modulation frequency = 36 Hz |                                              |                               |                               |
|-------|-------------------------------|----------------------------------------------|-------------------------------|-------------------------------|------------------------------|----------------------------------------------|-------------------------------|-------------------------------|
|       | Cl <sup>-</sup>               | CH <sub>3</sub> SO <sub>3</sub> <sup>-</sup> | HSO <sub>4</sub> <sup>-</sup> | ClO <sub>4</sub> <sup>-</sup> | Cl <sup>-</sup>              | CH <sub>3</sub> SO <sub>3</sub> <sup>-</sup> | HSO <sub>4</sub> <sup>-</sup> | ClO <sub>4</sub> <sup>-</sup> |
| Water | 0.39                          | 0.40                                         | 0.38                          | 0.41                          | 0.38                         | 0.39                                         | 0.38                          | 0.39                          |
| ACN   | 0.21                          | 0.23                                         | 0.46                          | 0.86                          | 0.22                         | 0.24                                         | 0.45                          | 0.81                          |
| PC    | 0.22                          | 0.44                                         | 0.70                          | 0.96                          | 0.21                         | 0.44                                         | 0.68                          | 0.92                          |

**Table S2** Dopant densities ( $N_D$ , in  $10^{18} \text{ cm}^{-3}$ ) derived from linear fits in Fig. 3.

|       | Modulation frequency = 3.6 Hz |                                              |                               |                               | Modulation frequency = 36 Hz |                                              |                               |                               |
|-------|-------------------------------|----------------------------------------------|-------------------------------|-------------------------------|------------------------------|----------------------------------------------|-------------------------------|-------------------------------|
|       | Cl <sup>-</sup>               | CH <sub>3</sub> SO <sub>3</sub> <sup>-</sup> | HSO <sub>4</sub> <sup>-</sup> | ClO <sub>4</sub> <sup>-</sup> | Cl <sup>-</sup>              | CH <sub>3</sub> SO <sub>3</sub> <sup>-</sup> | HSO <sub>4</sub> <sup>-</sup> | ClO <sub>4</sub> <sup>-</sup> |
| Water | 24                            | 16                                           | 23                            | 20                            | 20                           | 14                                           | 19                            | 16                            |
| ACN   | 5.9                           | 4.2                                          | 4.4                           | 3.3                           | 2.9                          | 2.3                                          | 2.6                           | 2.2                           |
| PC    | 1.1                           | 1.8                                          | 2.6                           | 3.7                           | 0.5                          | 0.8                                          | 1.2                           | 2.2                           |
